# Supplementary material
Source: Springer Nature journal article supplement (https://www.springermedizin.de/resource/supplementary/12955_2012_1025_MOESM4_ESM.pdf/9558674)

(A)

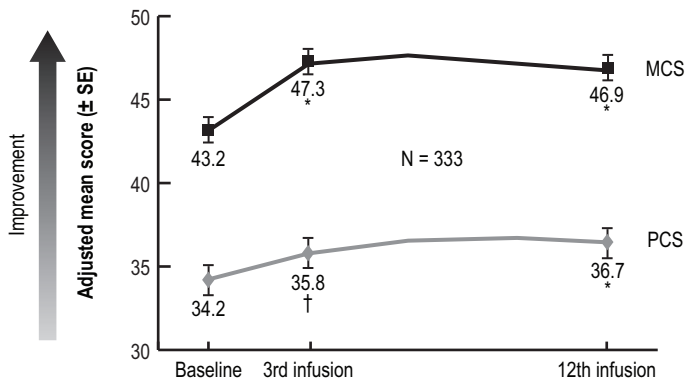

| SF-12v2 score change from baseline | PCS | +1.6 | +2.4 |
|------------------------------------|-----|------|------|
|                                    | MCS | +4.1 | +3.6 |

(B)

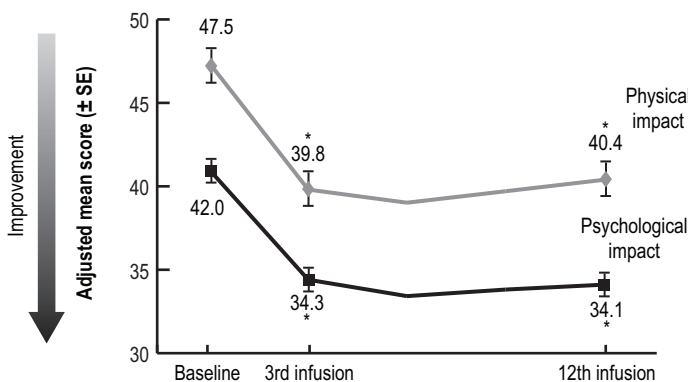

| MSIS-29 score change from baseline | Physical      | -7.7 | -7.1 |
|------------------------------------|---------------|------|------|
|                                    | Psychological | -7.6 | -7.9 |

(C)

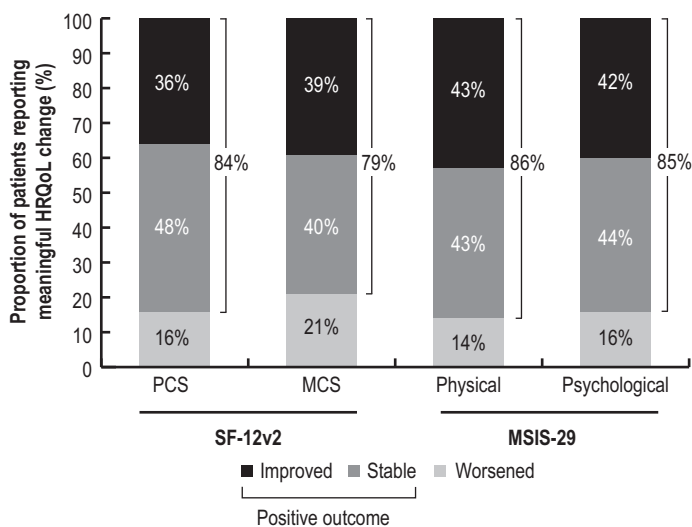

Supplement: MOESM4 [file 9558674]
